# Supplementary material for: Synthesis and properties of a ROMP backbone polymer with efficient, laterally appended nonlinear optical chromophores
Source: Royal Society of Chemistry journal article supplement (doi:10.1039/b314789d), 2004-01-01
Supplement: b314789d.doc [file b314789d.doc]

**Supplementary Material (ESI) for *J. Mater. Chem.***

**This journal is © The Royal Society of Chemistry**

**Synthesis and properties of a ROMP backbone polymer with efficient laterally appended nonlinear optical chromophores**

Jean-Manuel Raimundo, Steve Lecomte, Michael J. Edelmann, Simona Concilio, Ivan Biaggio, Christian Bosshard, Peter Günter and François Diederich*

**Electronic Supplementary Material (ESI)**

*) Correspondence Address:

Professor François Diederich

Laboratorium für Organische Chemie

ETH-Hönggerberg, HCI

CH-8093 Zürich

Tel: (0)1 632 29 92

Fax: (0)1 632 11 09

[diederich@org.chem.ethz.ch](mailto:diederich@org.chem.ethz.ch)

**ESI: Synthesis of polymer 1**

Reagents and solvents were purchased reagent grade and used without further purification. DEE **8** was prepared according to literature procedure.1  CH2Cl2 was dried over CaH2, PhMe and THF over Na. Evaporations and concentrations *in vacuo* were carried out at H2O-aspirator pressure.

*(4-Iodophenyl)methylamine* (**3**). Iodine (24.1 g, 95 mmol) was added in small portions to a cold (12–15 °C) solution of sodium hydrogencarbonate (16.75 g, 140 mmol) and *N*-methylaniline (10 g, 94 mmol) in H2O (160 ml). After stirring (45 min), the product was extracted with Et2O (100 ml) and the organic phase washed successively with a saturated aq. sodium thiosulfate solution (100 ml), then with H2O (150 ml), dried (MgSO4) and the solvent evaporated *in vacuo.* The residue was purified by chromatography (SiO2–60H, hexane/ethyl acetate 5:3) giving **3** (8.8 g, 40%). Easily decomposing pale-yellow oil. 1H-NMR (CDCl3, 200 MHz): 2.70 (*s*, 3 H); 6.30 (*d*, *J* = 9.2, 2 H); 7.35 (*d*, *J* = 9.2, 2 H).

*6-[(4-Iodophenyl)(methyl)amino]hexan-1-ol* **(9**). To a solution of **3** (10 g, 43 mmol) and 6-bromohexanol (10.87 g, 60 mmol) in dry 1-butanol (100 ml), K2CO3 (8.65 g, 60 mmol) was added under N2. The solution was heated to reflux for 72 h. After cooling, the solution was concentrated to 10 ml and the organic phase was diluted with CH2Cl2and washed with H2O. The organic phase was dried (MgSO4) and the compound purified by chromatography (SiO2–60, ethyl acetate/hexane 5:3) affording **9** (8.6 g, 60%). Slight yellow oil (decomposing rapidly). 1H-NMR (CDCl3, 200 MHz): 1.46–1.28 (*m*, 4 H); 1.66–1.48 (*m*, 4 H); 2.89 (*s*, 3 H); 3.27 (*t*, *J* = 7.6, 2 H); 3.64 (*t*, *J* = 6.2, 2 H); 6.45 (*d*, *J* = 9.2, 2 H); 7.44 (*d*, *J* = 9.2, 2 H). 13C-NMR (CDCl3, 50 MHz): 25.60; 26.46; 26.87; 32.65; 38.20; 52.49; 62.81; 114.30; 137.60; 148.75. Anal. calc. for C13H20INO (333.21): C 46.86, H 6.05, N 4.20; found: C 46.76, H 5.93, N 4.37.

*6-[(4-Iodophenyl)(methyl)amino]hexyl 4-methylbenzenesulfonate* (**4**). To a solution of **9** (3 g, 9 mmol) in dry CH2Cl2 (50 ml) under N2, pyridine (0.87 ml, 10.8 mmol) and a solution of *p*-toluenesulfonyl chloride (2.06 g, 10.8 mmol) in dry CH2Cl2 were added. The mixture was stirred at room temperature under N2 for 18 h, after which it was washed with aq. 1 m HCl solution (50 ml) and H2O (50 ml). The organic phase was dried (MgSO4), the solvent evaporated *in vacuo* and the product purified by chromatography (SiO2–60, hexane/CH2Cl2 1:2) affording **4** (3.60 g, 84%) White solid. M.p. 90.8-91.0 °C. 1H-NMR (CDCl3, 200 MHz): 1.20–1.40 (*m*, 4 H); 1.40–1.54 (*m*, 2 H); 1.56–1.72 (*m*, 2 H); 2.44 (*s*, 3 H); 2.87 (*s*, 3 H); 3.23 (*t*, *J* = 7.2, 2 H); 4.01 (*t*, *J* = 6.2, 2 H); 6.42 (*d*, *J* = 9.2, 2 H); 7.33 (*d*, *J* = 8.2, 2 H); 7.43 (*d*, *J* = 9.2, 2 H); 7.78 (*d*, *J* = 8.2, 2 H). 13C-NMR (CDCl3, 50 MHz): 21.6; 25.2; 26.3; 26.4; 28.7; 38.2; 52.4; 70.4; 111.2; 114.3; 127.8; 129.8; 133.2; 137.6; 144.7; 148.7. FAB-MS (3-NOBA): 487.0 (90, M+); 361.1 (19); 246.0 (100); 120.0 (20). Anal. calc. for C20H26INO3S (487.40): C 49.29, H 5.38, I 26.04, N 2.87, O 9.85, S 6.58; found: C 49.48, H 5.33, I 25.74, N 2.81, O 9.95, S 6.69.

*(*±*)-Bicyclo[2.2.1]hept-5-ene-2-*exo*-carboxylic acid* (**5**). Cyclopentadiene (25 ml, 0.30 mmol) and methyl acrylate (30.1 ml, 0.355 mmol) were dissolved in CH2Cl2 (30 ml) and the solution was refluxed for 24 h. The solvent was evaporated *in vacuo* and the resulting crude product was dissolved in a solution of sodium methoxide (5.3 g of Na in 80 ml of MeOH) and heated to reflux for 4 h (aliquots were taken and analyzed by 1H-NMR, integration of the ester methyl group indicated a thermodynamic product ratio of 3:2 *exo*/*endo* after this time). The methanol was evaporated *in vacuo*, the resulting residue dissolved in H2O (50 ml), and the solution heated to reflux until the methyl ester was completely transformed into the carboxylic acid (TLC control). The basic solution was extracted with Et2O (2 x 25 ml) to remove dicyclopentadiene. The aq. solution was acidified with 5 N sulfuric acid and extracted with Et2O (3 x 250 ml). The combined organic extracts were washed with cold H2O (25 ml) and dried (MgSO4). To separate the *endo* isomer of **5**, an iodolactonization reaction was carried out. The *endo/exo* carboxylic acid mixture was dissolved in an aq. solution of sodium hydrogencarbonate (28.8g in 460 ml of H2O) and an aq. solution of I2 (25.2g) and KI (53.2g) in 150 ml of H2O was added dropwise until a dark brown colour persisted. The aq. solution was extracted with Et2O (5 x 200 ml) to remove the iodolactone. A 10% sodium thiosulfate solution (50 ml) was added to the aq. phase to decolorize the solution. The resulting aqueous phase was acidified to pH 2 by slow addition of 1 N sulfuric acid. The resulting mixture was extracted with Et2O (4 x 150 ml), readjusting the aq. phase to pH 2 after each extraction. The Et2O extracts were combined, dried (MgSO4) and filtered over Celite. The resulting filtrate was concentrated to afford a pale-yellow crystalline solid. The latter was dissolved in pentane and precipitated at –78 °C to provide pure **5** (7.9 g, 18%). 1H-NMR (CDCl3, 200 MHz): 1.35–1.42 (*m*, 2 H); 1.52 (*d*, *J* = 10.0, 1 H); 1.93 (*dt*, *J* = 12.4, 1 H); 2.22–2.27 (*m*,1 H); 2.92 (*br* *s*, 1 H); 3.09 (*br* *s*, 1 H); 6.11–6.15 (*m*, 2 H); 11.2–11.8 (*br* *s*, 1 H). 13C-NMR (CDCl3, 50 MHz): 30.3; 41.6; 43.2; 46.4; 46.7; 135.7; 138.1; 182.9.

*(*±*)-Bicyclo[2.2.1]hept-5-en-2-*exo*-ol* (**6)***.* A solution of **5** (4.80 g, 34.8 mmol) in dry Et2O (30 ml) was added slowly (30 min) under Ar to a solution of LiAlH4 (2.00 g, 53.0 mmol) in dry Et2O (40 ml). After stirring for 9 h at room temperature and for 45 min under reflux, the mixture was cooled and treated successively with H2O (20 ml) and a 20% aq. HCl solution (50 ml). The organic phase was separated and washed with 10% aq. NaOH, saturated aq. NaCl solution, H2O, dried (MgSO4) and concentrated*.* Purification by chromatography (SiO2–60H, CH2Cl2) gave **6** (3.9 g, 90%). Colourless liquid. 1H-NMR (CDCl3, 200 MHz): 1.05–1.15 (*m*, 1 H); 1.19–1.26 (*m*, 1 H); 1.29–1.34 (*m*, 2 H); 1.54–1.68 (*m*, 1 H); 1.82 (*br* *s*, 1 H); 2.75 (*br* *s*, 1 H); 2.81 (*br* *s*, 1 H); 3.53 (*m*, 1 H); 3.65 (*m*, 1 H); 6.05 (*m*, 2 H). 13C-NMR (CDCl3, 50 MHz): 29.35; 41.34; 41.62; 43.12; 44.77; 67.21; 136.50; 136.76.

*(*±*)-*N*-{6-[Bicyclo[2.2.1]hept-5-en-2-*exo*-ylmethoxy]hexyl}-4-iodo-*N*-methylaniline* (**7**). Under N2, NaH (0.23 g, 4.5 mmol, 60% in oil) was added portionwise to a solution (0 °C) of **6** (0.52 g, 4.2 mmol) in dry THF (15 ml). The solution was stirred at 0 °C for 30 min and then a solution of **4** (1.7 g, 3.5 mmol) and 18-crown-6 (5% w/w) in THF (5 ml) was added. The mixture was then slowly warmed up to room temperature and stirred at this temperature for 2 h. The solution was washed successively with an aq. NaHCO3 solution (30 ml) and with H2O (100 ml). The organic phase was dried (MgSO4) and concentrated *in vacuo*. The residue was purified by chromatography (SiO2-60, hexane/CH2Cl2 1:2) affording **7** (1.20 g, 62%). Slight yellow oil . 1H-NMR (CDCl3, 200 MHz): 1.04-1.76 (*m*, 13 H); 2.76 (2 x *br* *s*, 2 H); 2.88 (*s*, 3 H); 3.20-3.31 (*m*, 2 H); 3.32-3.50 (*m*, 4 H); 6.08 (*dd*, *J* = 5.4 and 3.0, 2 H); 6.44 (*d*, *J* = 9.2, 2 H); 7.43 (*d*, *J* = 9.2, 2 H). 13C-NMR (CDCl3, 50 MHz): 26.02; 26.41; 26.86; 29.60; 29.66; 38.16; 38.80; 41.47; 43.65; 44.94; 52.50; 70.90; 75.54; 76.38; 111.04; 114.40; 136.73; 137.73; 148.93. EI-MS: 439.1 (45, *M*+); 373.1 (8); 246.0 (100); 232.0 (5); 120.1 (21). Anal. calc. for C19H30INO (439.38): C 57.41, H 6.88, I 28.88, N 3.19, O 3.64; found: C 57.47, H 6.83, I 28.46, N 3.33, O 3.91.

*(*±*)-*N*-{6-[Bicyclo[2.2.1]hept-5-en-*exo*-2-ylmethoxy]hexyl}-4-[(3*E*)-3,4-bis({[*tert*-butyl(dimethyl)silyl]oxy}methyl)-6-(4-nitrophenyl)hex-3-ene-1,5-diyn-1-yl]-*N*-methylaniline* (**2**). To a degassed solution of **8** (0.30 g, 0.62 mmol) and **7** (0.30 g, 0.68 mmol) in dry NEt3 (30 ml), CuI (7 mg, 0.04 mmol) and [PdCl2(PPh3)2] (21 mg, 0.03 mmol) were added. The mixture was stirred at room temperature for 24 h, protected from day light. The organic phase was washed with saturated aq. NH4Cl solution (150 ml) and extracted with CH2Cl2 (150 ml). The organic phase was washed with H2O (100 ml) and dried (MgSO4). Removal of the solvent *in vacuo* and purification of the residue by chromatography (SiO2-60, hexane/CH2Cl2 1:2) afforded **2** (0.30g, 60%). Red-black solid. M.p. 51-52 °C. 1H-NMR (CDCl3, 300 MHz): 0.17 ( 2 x *s*, 12 H); 0.97 (2 x *s*, 18 H); 1.08-1.51 (*m*, 6 H); 1.52-1.78 (*m*, 7 H); 2.75 (*br* *s*, 1 H); 2.82 (*br* *s*, 1 H); 2.98 (*s*, 3 H); 3.25-3.54 (*m*, 8 H); 4.62 (*s*, 1 H); 4.65 (*s*, 1 H); 6.05-6.13 (*m*, 2 H); 6.63 (*d*, *J* = 9.0, 2 H); 7.34 (*d*, *J* = 9.2, 2 H); 7.58 (*d*, *J* = 8.8, 2 H); 8.22 (*d*, *J* = 9.2, 2 H). 13C-NMR (CDCl3, 75 MHz): -5.20; 18.28, 18.35; 25.80, 25.84; 26.01; 26.68; 26.84; 29.57; 29.64; 38.18; 38.78; 41.43; 43.62; 44.91; 52.34; 63.94; 64.31; 70.88; 75.52; 85.31; 93.01; 98.01; 104.79; 109.06; 111.46; 123.76; 126.17; 130.58; 131.95; 132.67; 133.01; 136.73; 146.96; 149.45. Anal. Calc for C47H68N2O5Si2 (797.22): C 70.81; H 8.60; N 3.51; found: C 70.82; H 8.49; N 3.54.

*Polymer* **1**. A well degassed solution of monomer **2** (32.5 mg, 0.0407 mmol) in dry THF (1 mL) was added in one portion to a rapidly stirred solution of catalyst [RuCl2(PCy3)2CHPh](3.2 mg, 0.00407 mmol). The resulting solution was stirred under Ar for 2 hours at room temperature. The polymerisation was terminated by addition of an excess of benzaldehyde (200 µL) in one portion and the mixture was stirred for 1 h. The polymer was isolated by precipitation with an excess of methanol as red oil. Precipitation from dichloromethane with methanol, followed by a centrifugation to complete the precipitation, and further purification by GPC (glass column 5 x 80 cm, *Bio-Rad Bio-Beads S-X1*, CH2Cl2) yielded the product as red oil in quantitative yield. The polymeric length was estimated by analytical GPC, calibrated with polystyrene standards from *Polymer Laboratories* as well as by using various monodisperse poly(triacetylene) oligomers.2 The setup involved two columns connected in series (*Tosohaas TSKgel G2500 HR* (5 *µ*m) and *Tosohaas TSKgel G2000 HR* (5 *µ*m), 7.8 mm ID x 30 cm. The instrumentation was a *Merck Hitachi* HPLC pump *L-7100*, column oven *L-7360,* UV-detector *L-7400*, and chromato-integrator *D-2500*. The detector wavelength was fixed at 400 nm. The solvent was HPLC-grade THF, used at 40 °C with a flow rate of 1 ml/min.  1H-NMR (CDCl3) signals were broad. Assignments were made by comparison to monomer **2**. 1H-NMR (CDCl3, 300 MHz): 0.17 (*br* 2 x *s*, CH3Si); 0.97 (*br* 2 x *s*, (CH3)3Si); 1.08–1.51 (*br m*, CHalk); 1.52–1.78 (*br m*, CHalk); 2.75 (*br s*); 2.82 (*br s*); 2.98 (*br s*, CH3N); 3.25-3.54 (*br m*, CHalk); 4.62 (*br s*); 4.65 (*br s*); 5.10–5.40 (*br s*, CH=CH); 6.63 (*br d*, *J* = 9.0, CHaryl); 7.34 (*br d*, *J* = 9.2, CHaryl); 7.58 (*br d*, *J* = 8.8, CHaryl); 8.22 (*br d*, *J* = 9.2, CHaryl).

**1H-NMR (300 MHz, CDCl3) spectral comparison between monomer 2 (bottom) and polymer 1 (top) (ESI)**

###### ppm

###### References

1 R. E. Martin, U. Gubler, C. Boudon, C. Bosshard, J.-P. Gisselbrecht, P. Günter, M. Gross and F. Diederich, *Chem. Eur. J.*, 2000, **6**, 4400.

2 M. J. Edelmann, M. A. Estermann, V. Gramlich and F. Diederich, *Helv. Chim. Acta*, 2001, **84**, 473.
